# Supplementary material
Source: Springer Nature journal article supplement (https://www.springermedizin.de/resource/supplementary/12889_2009_2060_MOESM4_ESM.pdf/9484458)

Illness

Poverty

Borrow

Debt  
(money, labour)

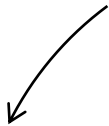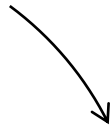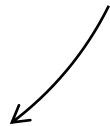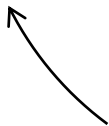

Supplement: MOESM4 [file 9484458]
